# Supplementary material for: Syntheses, structures and properties of seven isomorphous 1D Ln3+complexes Ln(BTA)(HCOO)(H2O)3 (H2BTA = bis(tetrazoly)amine, Ln = Pr, Gd, Eu, Tb, Dy, Er, Yb) and two 3D Ln3+ complexes Ln(HCOO)3 (Ln = Pr, Nd)
Source: Royal Society of Chemistry journal article supplement (doi:10.1039/b808394k), 2008-01-01
Supplement: b808394k.pdf [file b808394k.pdf]

## Supporting Information

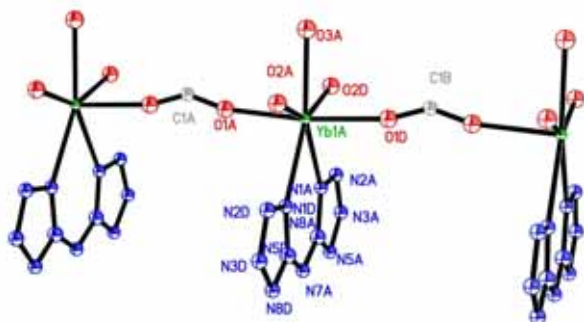

**Fig 7.** The molecular structure of 7, with atom labels and 30% probability displacement ellipsoids for non-H atoms.

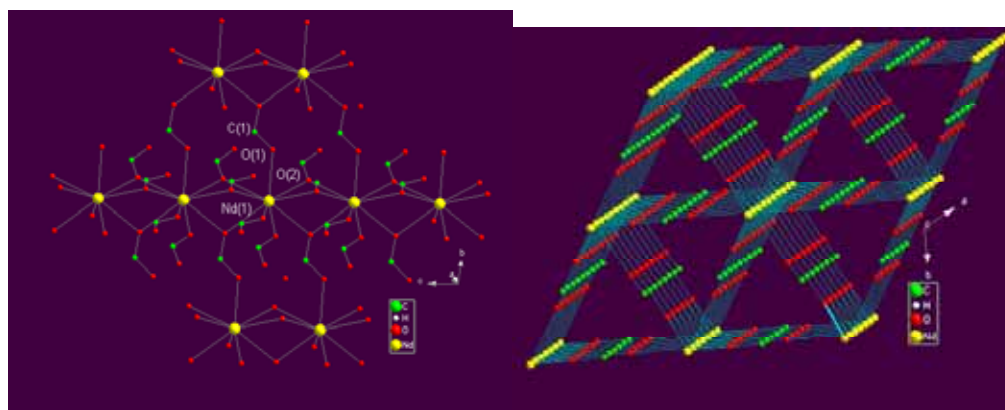

**Fig.8.** The atomic labeling diagram of 9(a) and the packing diagram of 9.

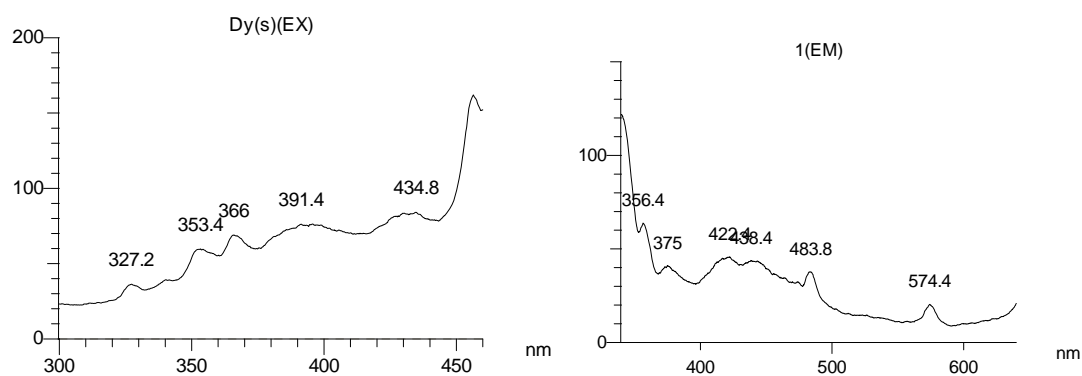

**Fig.9.** The excitation spectrum (a) and emission spectrum of the solid sample of 5 (b).

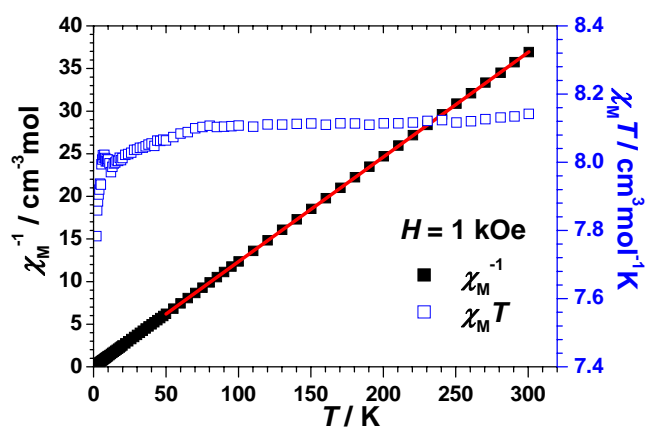

**Fig. 10** The magnetic moment  $\chi_M T$  versus  $T$  of **4** in the temperature range of 2-300K.

The  $\chi_M^{-1}$  versus  $T$  plot in the range from 300 to 50 K. The continuous red line represent the fit to

the theoretical models
